# Supplementary material for: Elderly Patients with Mild Cognitive Impairment Exhibit Altered Gut Microbiota Profiles
Source: Hindawi journal article supplement (doi:10.1155/2021/5578958), 2021-11-22
Supplement: f1 [file 5578958.f1.pdf]

**Table S1. Bacterial species with significant change of relative abundance between MCI and control groups.**

| Level   | Phylum             | Genus                     | Species                          | Alteration in MCI | p-value |
|---------|--------------------|---------------------------|----------------------------------|-------------------|---------|
| Species | Firmicutes         | Staphylococcus            | Staphylococcus lentus            | Increased         | 0.00072 |
| Species | Proteobacteria     | Sphingomonas              | Sphingomonas panni               | Increased         | 0.00137 |
| Species | Firmicutes         | Staphylococcus            | Staphylococcus intermedius       | Increased         | 0.00691 |
| Species | Bacteroidetes      | Hydrobacter               | Hydrobacter penzbergensis        | Increased         | 0.01794 |
| Species | Actinobacteria     | Bifidobacterium           | Bifidobacterium callitrichos     | Increased         | 0.02004 |
| Species | Actinobacteria     | Corynebacterium           | Corynebacterium matruchotii      | Increased         | 0.02393 |
| Species | Firmicutes         | Paenibacillus             | Paenibacillus senegalensis       | Increased         | 0.02535 |
| Species | Firmicutes         | Clostridium sensu stricto | Clostridium felsineum            | Increased         | 0.02611 |
| Species | Firmicutes         | Staphylococcus            | Staphylococcus saprophyticus     | Increased         | 0.02654 |
| Species | Firmicutes         | Lactobacillus             | Bacillus amyloliquefaciens       | Increased         | 0.0276  |
| Species | Verrucomicrobia    | Akkermansia               | Akkermansia glycaniphila         | Increased         | 0.02846 |
| Species | Actinobacteria     | Brevibacterium            | Brevibacterium linens            | Increased         | 0.02846 |
| Species | Bacteroidetes      | Hymenobacter              | Hymenobacter rigui               | Increased         | 0.0293  |
| Species | Fusobacteria       | Leptotrichia              | Leptotrichia buccalis            | Increased         | 0.0298  |
| Species | Firmicutes         | Pseudoramibacter          | Pseudoramibacter alactolyticus   | Increased         | 0.03269 |
| Species | Actinobacteria     | Corynebacterium 1         | Corynebacterium ureicelerivorans | Increased         | 0.03341 |
| Species | Firmicutes         | Streptococcus             | Streptococcus equi               | Increased         | 0.03441 |
| Species | Proteobacteria     | Eikenella                 | Eikenella corrodens              | Increased         | 0.03614 |
| Species | Synergistetes      | Pyramidobacter            | Pyramidobacter piscolens         | Increased         | 0.03805 |
| Species | Bacteroidetes      | Alistipes                 | Alistipes indistinctus           | Increased         | 0.04025 |
| Species | Epsilonbacteraeota | Helicobacter              | Helicobacter pametensis          | Increased         | 0.04051 |
| Species | Fusobacteria       | Fusobacterium             | Fusobacterium necrogenes         | Increased         | 0.04189 |
| Species | Actinobacteria     | Bifidobacterium           | Bifidobacterium longum           | Increased         | 0.04257 |
| Species | Firmicutes         | Anaerostipes              | Anaerostipes caccae              | Increased         | 0.04565 |
| Species | Firmicutes         | Johnsonella               | Johnsonella ignava               | Increased         | 0.04797 |
| Species | Bacteroidetes      | Parabacteroides           | Parabacteroides johnsonii        | Increased         | 0.04812 |
| Species | Firmicutes         | Megamonas                 | Megamonas rupellensis            | Increased         | 0.04889 |
| Species | Actinobacteria     | Corynebacterium           | Corynebacterium ulcerans         | Increased         | 0.0493  |
| Species | Firmicutes         | Lactobacillus             | Lactobacillus alimentarius       | Increased         | 0.04933 |
| Species | Firmicutes         | Leuconostoc               | Pediococcus pentosaceus          | Decreased         | 0.00039 |
| Species | Proteobacteria     | Pseudomonas               | Pseudomonas monteilii            | Decreased         | 0.00115 |
| Species | Firmicutes         | Lachnospira               | Lactobacillus rogosae            | Decreased         | 0.00137 |
| Species | Firmicutes         | Bacillus                  | Cloacibacterium normanense       | Decreased         | 0.0033  |
| Species | Firmicutes         | Ezakiella                 | Bacteroides coagulans            | Decreased         | 0.00503 |
| Species | Bacteroidetes      | Porphyromonas             | Porphyromonas gingivalis         | Decreased         | 0.00538 |
| Species | Firmicutes         | Lachnospira               | Lachnospira pectinoschiza        | Decreased         | 0.0076  |
| Species | Bacteroidetes      | Sphingobacterium          | Sphingobacterium multivorum      | Decreased         | 0.00815 |
| Species | Firmicutes         | Roseburia                 | Roseburia intestinalis           | Decreased         | 0.00876 |
| Species | Proteobacteria     | uncultured                | Achromobacter denitrificans      | Decreased         | 0.01029 |
| Species | Bacteroidetes      | Alloprevotella            | Alloprevotella tanneriae         | Decreased         | 0.01029 |

|         |                |                              |                               |           |         |
|---------|----------------|------------------------------|-------------------------------|-----------|---------|
| Species | Fusobacteria   | Fusobacterium                | Fusobacterium naviforme       | Decreased | 0.01124 |
| Species | Firmicutes     | Anoxynatronum                | Anoxynatronum sibiricum       | Decreased | 0.01229 |
| Species | Firmicutes     | Clostridium sensu stricto 11 | Clostridium collagenovorans   | Decreased | 0.01394 |
| Species | Firmicutes     | Clostridium sensu stricto 1  | Clostridium chartatabidum     | Decreased | 0.01403 |
| Species | Firmicutes     | Lachnoanaerobaculum          | Lachnoanaerobaculum saburreum | Decreased | 0.01831 |
| Species | Actinobacteria | Gordonibacter                | Gordonibacter pamelaee        | Decreased | 0.0193  |
| Species | Actinobacteria | Kocuria                      | Kocuria halotolerans          | Decreased | 0.02052 |
| Species | Bacteroidetes  | Bacteroides                  | Bacteroides salyersiae        | Decreased | 0.0208  |
| Species | Firmicutes     | Dialister                    | Bacteroides xylanisolvens     | Decreased | 0.02654 |
| Species | Proteobacteria | Aquabacterium                | Aquabacterium commune         | Decreased | 0.02855 |
| Species | Actinobacteria | Microbacterium               | Microbacterium gubbeenense    | Decreased | 0.03662 |
| Species | Firmicutes     | Streptococcus                | Streptococcus viridans        | Decreased | 0.03663 |
| Species | Proteobacteria | Vibrio                       | Pseudomonas fluorescens       | Decreased | 0.03755 |
| Species | Proteobacteria | Pantoea                      | Enterobacter cancerogenus     | Decreased | 0.03756 |
| Species | Proteobacteria | Escherichia                  | Escherichia hermannii         | Decreased | 0.04051 |
